# Supplementary material
Source: PubMed Central journal article supplement (PMC3250131)
Supplement: 1108810108_pnas.1108810108_SI.pdf [file 1108810108_pnas.1108810108_SI.pdf]

# Supporting Information

Saijo et al. 10.1073/pnas.1108810108

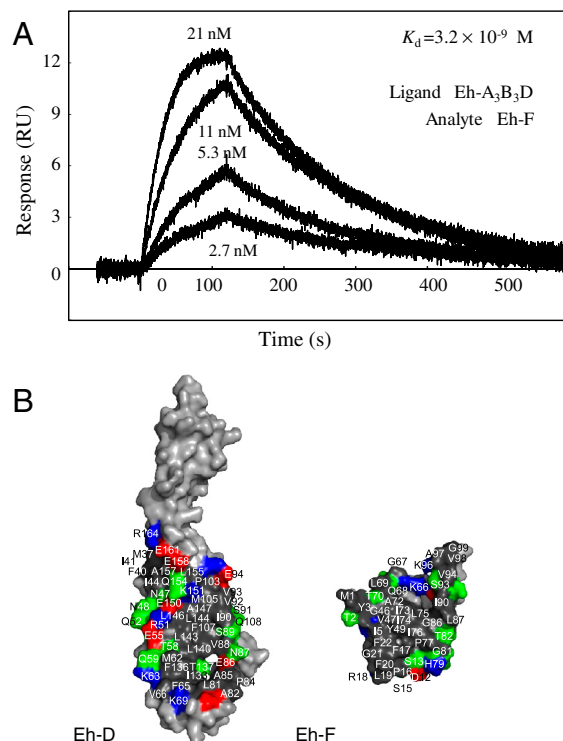

**Fig. S1.** Interactions between Eh-D and Eh-F. (A) Binding measurement was performed using the Biacore system. Sensorgrams for the binding of various concentrations of the analyte (Eh-F) to the ligand (Eh-A<sub>3</sub>B<sub>3</sub>D) are shown. (B) Surface representation of the interface between Eh-D and Eh-F: Polar residues (N, Q, S, T) are colored in green, positively charged residues (H, K, R) are blue, negatively charged residues (D, E) are red, and hydrophobic residues (A, C, F, G, L, M, P, V, W, Y) are dark gray. The residues with buried surface area of  $>10 \text{ \AA}^2$  are mapped on the surface.

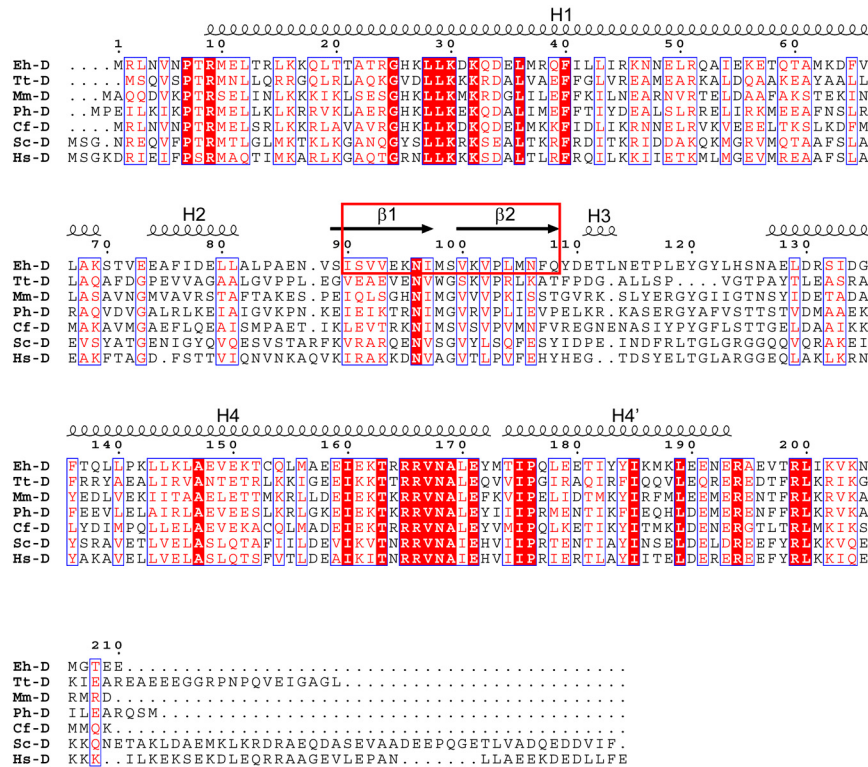

**Fig. S2.** Sequence alignment of the D subunits from different species. The primary sequences of the D subunits of V-ATPase were aligned: Eh-D, *Enterococcus hirae*; Tt-D, *Thermus thermophilus* HB8; Mm-D, *Methanosarcina mazei* G61; Ph-D, *Pyrococcus horikoshii*; Cf-D, *Clostridium feruidus*; Sc-D, *Saccharomyces cerevisiae*; and Hs-D, *Homo sapiens*. The secondary structures of Eh-D are shown above the sequences. The deleted region (90–108) of the mutation is indicated in the red box. The Dm mutant was constructed by the deletion of the  $\beta$ -hairpin region (90–108) and the insertion of two linker residues (GS).

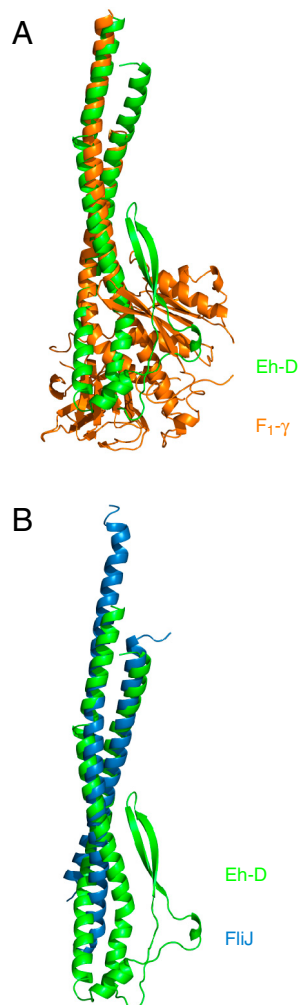

**Fig. S3.** Structural similarity of Eh-D with the  $\gamma$ -subunit and FliJ. (A) Eh-D (green) is superimposed with the  $\gamma$ -subunit (orange) of bovine F<sub>1</sub>-ATPase [Protein Data Bank (PDB) ID 1E79]. (B) Eh-D (green) is superimposed with FliJ (light blue) of *Salmonella* flagellar type III protein export apparatus (PDB ID 3AJW).

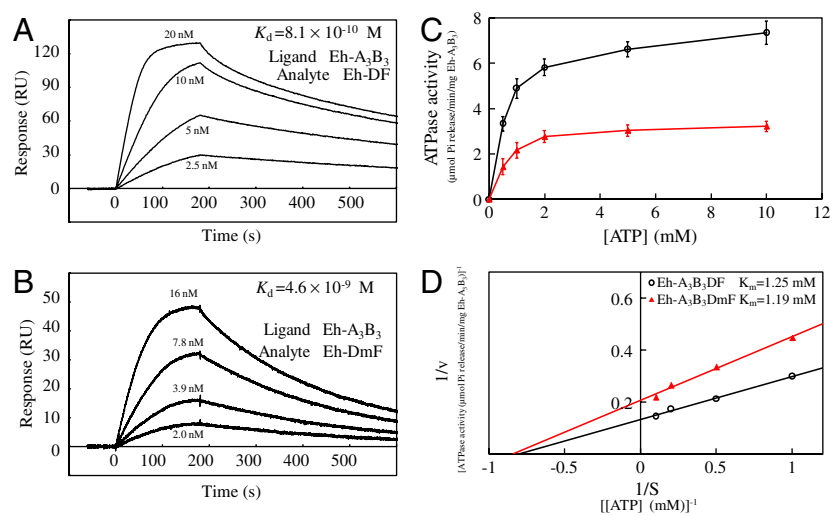

**Fig. S4.** Effect of the  $\beta$ -hairpin region of the D subunit. Binding measurements were performed using the Biacore system. Sensorgrams for the binding of various concentrations of analyte to ligand are shown. (A) Analyte, Eh-DF; ligand, Eh-A<sub>3</sub>B<sub>3</sub>. (B) Analyte, Eh-DmF; ligand, Eh-A<sub>3</sub>B<sub>3</sub>. (C) ATP concentration dependence of the ATPase activity of reconstituted Eh-A<sub>3</sub>B<sub>3</sub>DF (circle, black) and Eh-A<sub>3</sub>B<sub>3</sub>DmF (triangle, red). (D) The double reciprocal plot for the ATPase activity assay.



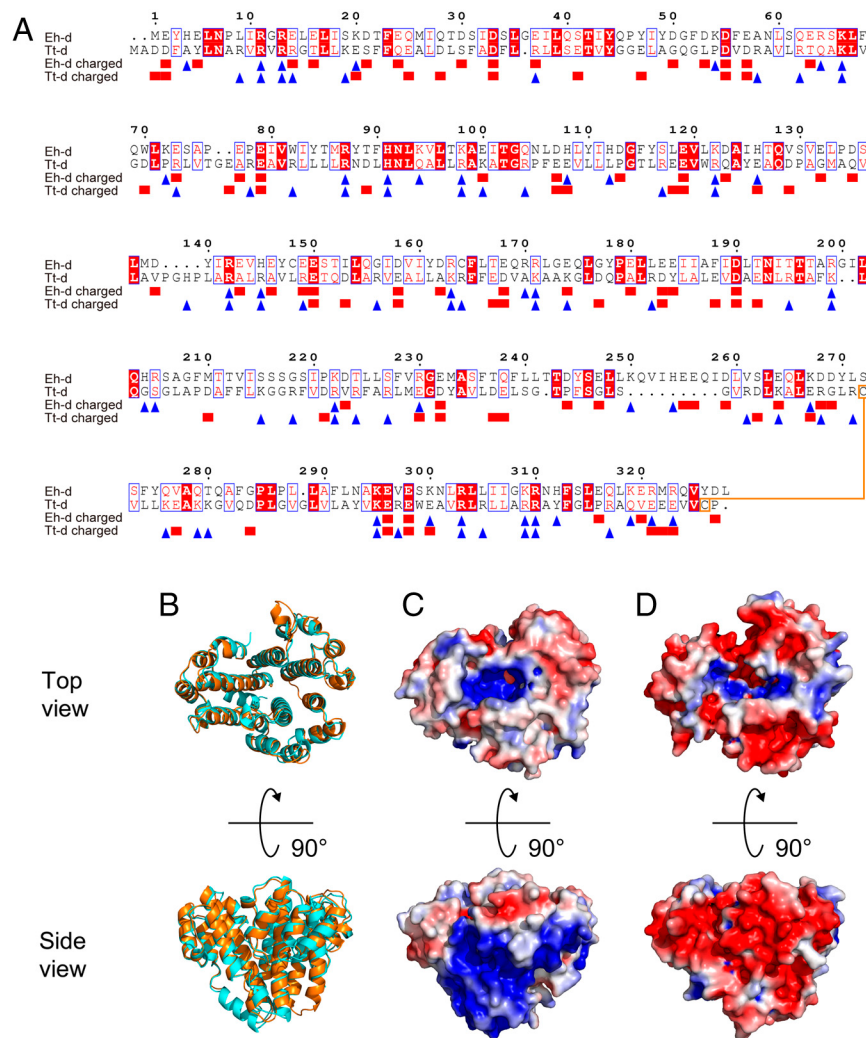

**Fig. S7.** Amino acid sequence similarity between Eh-d and Tt-d and homology modeling of Eh-d structure. (A) Sequence alignment of Eh-d and Tt-d. The charged residues are shown with red squares (positively charged) and blue triangles (negatively charged) below the sequence. The disulfide bonded cysteine residues are indicated with an orange box and line. (B) The homology model of Eh-d (orange) is superimposed with Tt-d (light blue). Electrostatic potential surface of Tt-d (C) and homology model of Eh-d (D) were produced in the same manner as in Fig. 5.

Table S1. Data collection and refinement statistics

|                                                                  | SeMet crystal*            |                  |                   |                  |
|------------------------------------------------------------------|---------------------------|------------------|-------------------|------------------|
| <i>Data collection</i>                                           |                           |                  |                   |                  |
| Space group                                                      | C2                        |                  |                   |                  |
| Cell dimensions                                                  |                           |                  |                   |                  |
| <i>a</i> , <i>b</i> , <i>c</i> , Å                               | 105.79, 68.43, 51.15      |                  |                   |                  |
| α, β, γ, °                                                       | 90, 114.99, 90            |                  |                   |                  |
|                                                                  | <i>Peak (reprocessed)</i> | <i>Peak</i>      | <i>Inflection</i> | <i>Remote</i>    |
| Wavelength, Å                                                    | 0.9791                    | 0.9791           | 0.9794            | 1.000            |
| Resolution, <sup>†</sup> Å                                       | 2.00 (2.11-2.00)          | 2.10 (2.21-2.10) | 2.10 (2.21-2.10)  | 2.10 (2.21-2.10) |
| <i>R</i> <sub>merge</sub> <sup>†</sup>                           | 0.090 (0.561)             | 0.084 (0.394)    | 0.048 (0.245)     | 0.045 (0.300)    |
| <i>I</i> / <i>σ</i> <i>I</i> <sup>†</sup>                        | 10.7 (2.8)                | 14.9 (3.8)       | 11.0 (3.0)        | 11.6 (2.9)       |
| Completeness, <sup>†</sup> %                                     | 97.2 (96.3)               | 97.4 (96.4)      | 97.0 (96.0)       | 96.9 (95.9)      |
| Redundancy <sup>†</sup>                                          | 6.1 (6.1)                 | 6.1 (6.1)        | 2.0 (2.1)         | 2.0 (2.0)        |
| <i>Refinement</i>                                                |                           |                  |                   |                  |
| Resolution, <sup>†</sup> Å                                       | 2.00 (2.05-2.00)          |                  |                   |                  |
| No. reflections <sup>†</sup>                                     | 21,696 (1,503)            |                  |                   |                  |
| <i>R</i> <sub>work</sub> / <i>R</i> <sub>free</sub> <sup>†</sup> | 19.4(26.3)/25.2(29.0)     |                  |                   |                  |
| No. atoms                                                        |                           |                  |                   |                  |
| Protein                                                          | 2,341                     |                  |                   |                  |
| Ligand/ion                                                       | 4                         |                  |                   |                  |
| Water                                                            | 152                       |                  |                   |                  |
| <i>B</i> factors                                                 |                           |                  |                   |                  |
| Protein                                                          | 41.8                      |                  |                   |                  |
| Ligand/ion                                                       | 56.7                      |                  |                   |                  |
| Water                                                            | 47.7                      |                  |                   |                  |
| rmsd                                                             |                           |                  |                   |                  |
| Bond lengths, Å                                                  | 0.011                     |                  |                   |                  |
| Bond angles, °                                                   | 1.276                     |                  |                   |                  |

\*All datasets were obtained from one selenomethionine (SeMet)-labeled crystal.

<sup>†</sup>Values in parentheses are for the highest-resolution shell.
